# Supplementary material
Source: publisher site journal article supplement (https://www.dovepress.com/article/499938)
Supplement: Supplementary file 1 [file get_supplementary_file.php]

| **Groups** | **Animals**  **No.** | **ALT**  **(U/L)** | | **AST**  **(U/L)** | | **UREA**  **(mg/dL)** | | **CREA**  **(mg/dL)** | |
| --- | --- | --- | --- | --- | --- | --- | --- | --- | --- |
| **Value** | **Mean ± SD** | **Value** | **Mean ± SD** | **Value** | **Mean ± SD** | **Value** | **Mean ± SD** |
| **2×Dose** | 1 | 31.9 | 33.13 ± 7.13 | 138.2 | 159.27 ± 53.51 | 40.84 | 40.11 ± 5.54 | 0.19 | 0.19 ± 0.01 |
| 2 | 26.7 | 119.5 | 34.24 | 0.18 |
| 3 | 40.8 | 220.1 | 45.25 | 0.20 |
| **5×Dose** | 4 | 39.0 | 37.13 ± 1.90 | 229.2 | 174.97 ± 48.94 | 49.84 | 42.13 ± 6.68 | 0.21 | 0.21 ± 0.02 |
| 5 | 37.2 | 134.1 | 38.09 | 0.19 |
| 6 | 35.2 | 161.6 | 38.47 | 0.22 |
| **10×Dose** | 7 | 31.6 | 26.97 ± 5.70 | 161.2 | 136.07 ±27.74 | 39.16 | 38.00 ± 7.32 | 0.21 | 0.20 ± 0.03 |
| 8 | 20.6 | 106.3 | 30.17 | 0.17 |
| 9 | 28.7 | 140.7 | 44.68 | 0.22 |

**Supplementary Table 1. The results of serum biochemical testing in safety assessment *in vivo***
